# Supplementary material for: Mechanisms for improved high-speed processability of active layer materials in bulk-heterojunction organic photovoltaics
Source: Research Square preprint supplement (doi:10.21203/rs.3.rs-5758932/v1), 2025-01-09
Supplement: Supplementary file 1 [file 3dacb2329bfa9309973a6264.pdf]

## **Supporting Information**

### **Mechanisms for improved high-speed processability of active layer materials in bulk-heterojunction organic photovoltaics**

#### **Table-of-contents**

Supplementary Notes 1-3

Supplementary Figures 1-20

Supplementary Tables 1-12

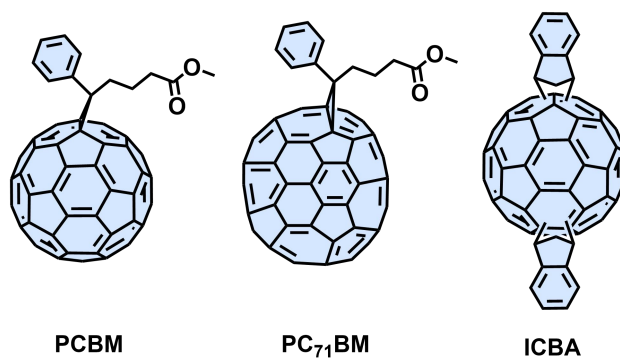

**Supplementary Fig. 1.** Chemical structures of PCBM series acceptors (PCBM<sup>1</sup>, PC<sub>71</sub>BM<sup>2</sup> and ICBA<sup>3</sup>) investigated in this work.

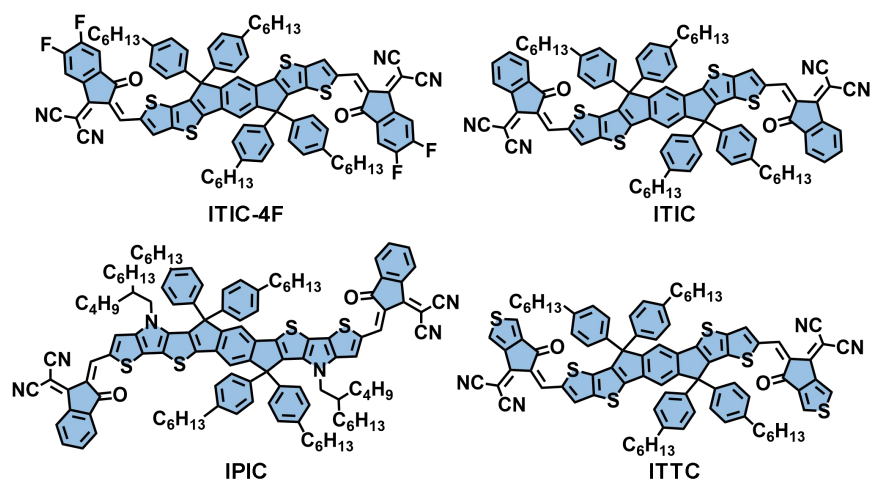

**Supplementary Fig. 2.** Chemical structures of ITIC series acceptors (ITIC-4F<sup>4</sup>, ITIC<sup>5</sup>, IPIC<sup>6</sup> and ITTC<sup>7</sup>) investigated in this work.

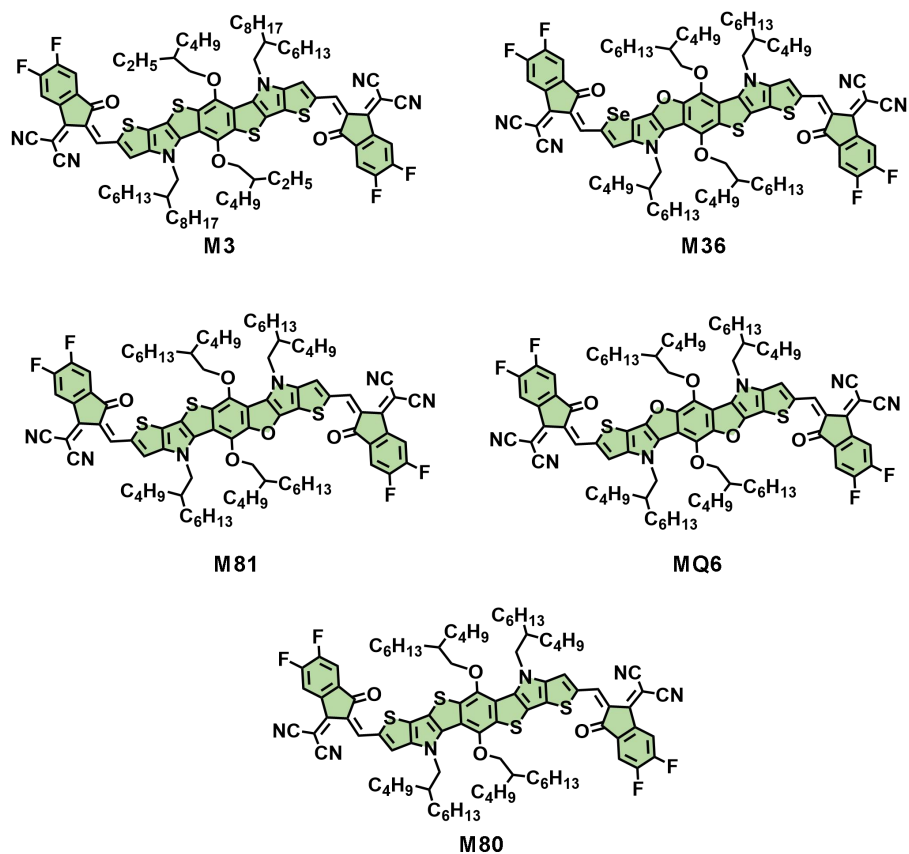

**Supplementary Fig. 3.** Chemical structures of M3 series acceptors (M3<sup>8</sup>, M36<sup>9</sup>, M81<sup>9</sup>, MQ6<sup>10</sup> and M80<sup>9</sup>) investigated in this work.



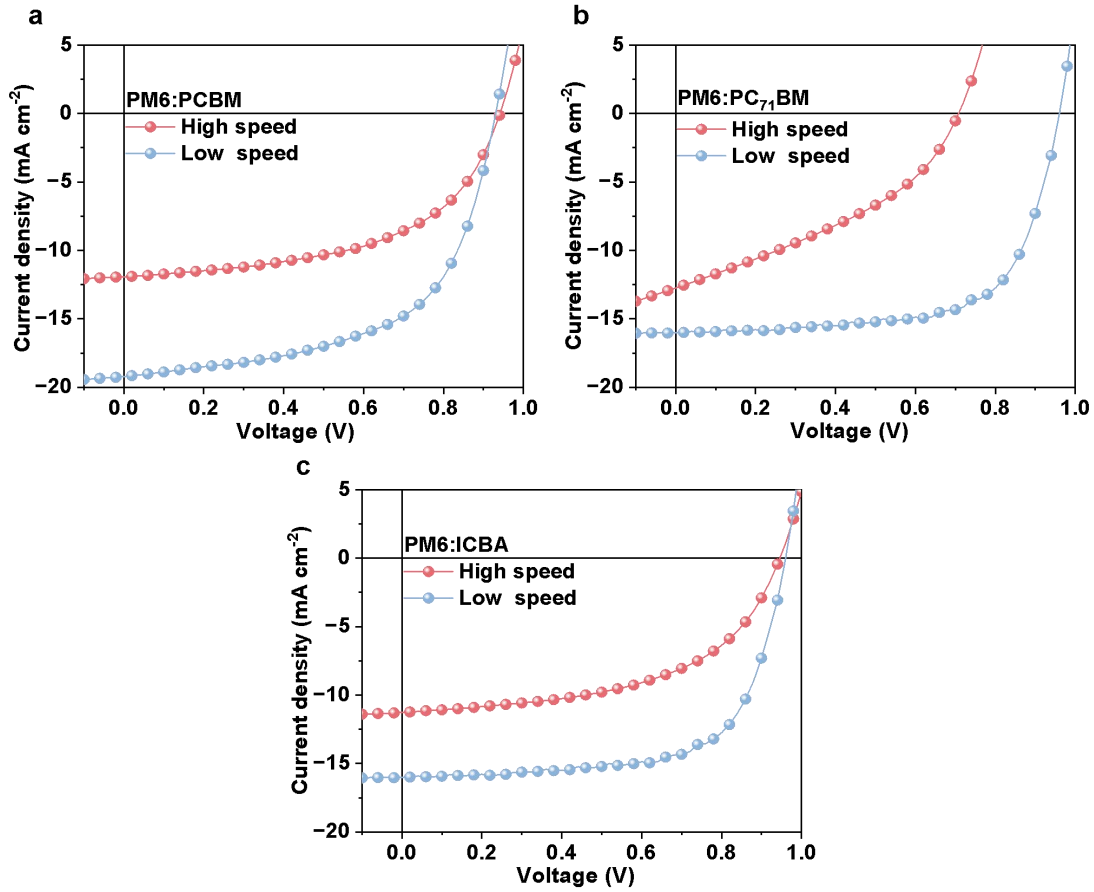

**Supplementary Fig. 5.**  $J$ - $V$  curves of the devices composed of PM6 as the donor and PCBM series as the acceptor fabricated by low-speed and high-speed coating processes.

**Supplementary Table 1.** Summary of the PCE of the device of PM6:PCBM series acceptors fabricated under normal speed and high speed.

| Acceptor            | Speed<br>( $\text{m min}^{-1}$ ) | $V_{\text{oc}}$<br>(V) | $J_{\text{sc}}$<br>( $\text{mA cm}^{-2}$ ) | FF<br>(%) | PCE <sup>a</sup><br>(%) |
|---------------------|----------------------------------|------------------------|--------------------------------------------|-----------|-------------------------|
| PCBM                | 1.8                              | 0.930                  | 19.22                                      | 57.99     | 10.37 (9.81±0.56)       |
| ICBM                |                                  | 0.960                  | 16.03                                      | 66.94     | 10.30 (10.22±0.08)      |
| PC <sub>71</sub> BM |                                  | 0.916                  | 12.70                                      | 47.60     | 5.54 (5.12±0.42)        |
| PCBM                | 30.0                             | 0.941                  | 11.93                                      | 53.42     | 6.00 (5.53±0.47)        |
| ICBM                |                                  | 0.970                  | 14.77                                      | 34.90     | 5.00 (4.33±0.67)        |
| PC <sub>71</sub> BM |                                  | 0.708                  | 12.74                                      | 37.31     | 3.37 (3.15±0.22)        |

<sup>a</sup>)The average PCE values with standard deviations were obtained from 10 independent cells.

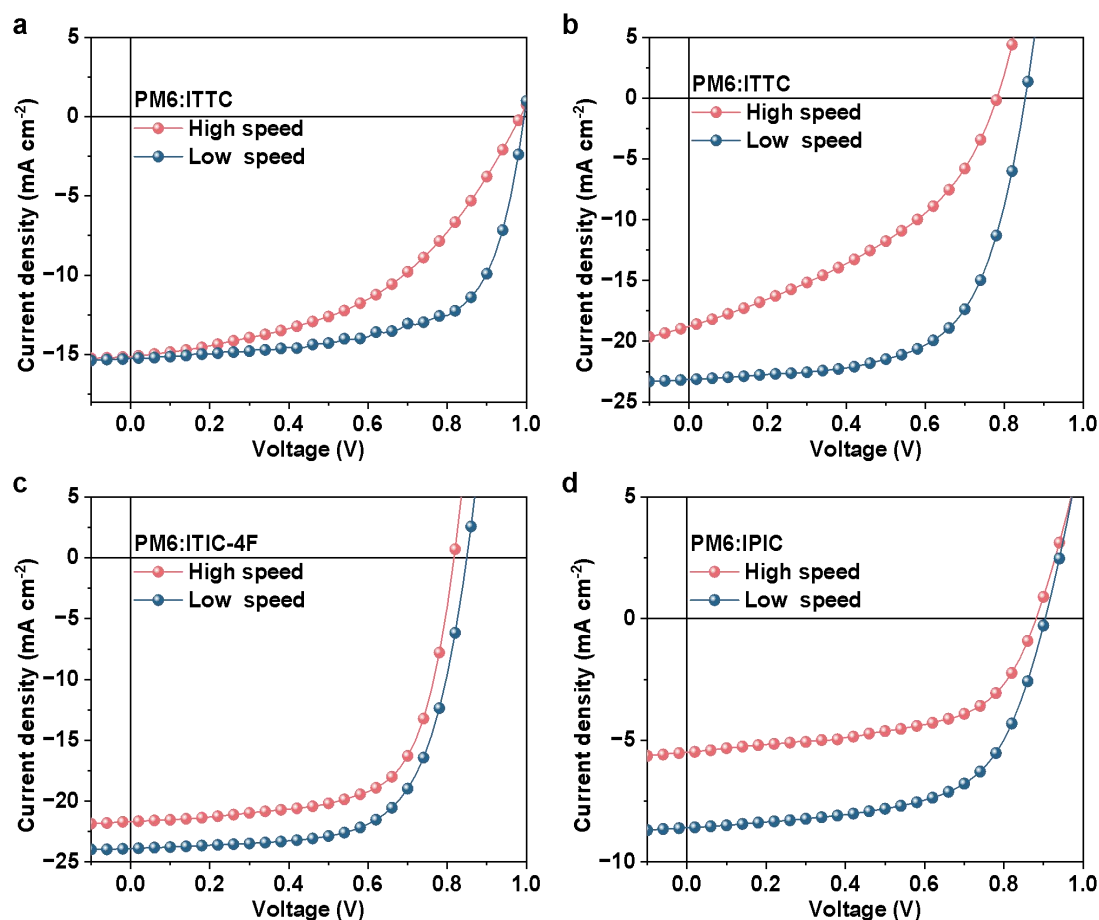

**Supplementary Fig. 6.**  $J$ - $V$  curves of the devices composed of PM6 as the donor and ITIC series as the acceptor fabricated by low-speed and high-speed coating processes.

**Supplementary Table 2.** Summary of the PCE of the device of PM6:ITIC series acceptors fabricated under normal speed and high speed.

| Acceptor | Speed<br>(m min <sup>-1</sup> ) | $V_{oc}$<br>(V) | $J_{sc}$<br>(mA cm <sup>-2</sup> ) | FF<br>(%) | PCE <sup>a</sup><br>(%) |
|----------|---------------------------------|-----------------|------------------------------------|-----------|-------------------------|
| IT-4F    | 1.8                             | 0.849           | 23.89                              | 66.83     | 13.56 (13.1±0.46)       |
| ITIC     |                                 | 0.994           | 15.24                              | 66.28     | 10.04 (9.86±0.18)       |
| IPIC     |                                 | 0.994           | 8.60                               | 61.09     | 4.75 (4.49±0.26)        |
| ITTC     |                                 | 0.853           | 23.16                              | 63.18     | 12.48 (11.86±0.61)      |
| IT-4F    | 30.0                            | 0.817           | 21.67                              | 67.08     | 11.88 (11.48±0.40)      |
| ITIC     |                                 | 0.985           | 15.14                              | 46.85     | 6.99 (6.96±0.03)        |
| IPIC     |                                 | 0.881           | 5.50                               | 56.71     | 2.75 (2.50±0.25)        |
| ITTC     |                                 | 0.782           | 18.78                              | 40.22     | 5.90 (5.22±0.68)        |

<sup>a</sup>The average PCE values with standard deviations were obtained from 10 independent cells.

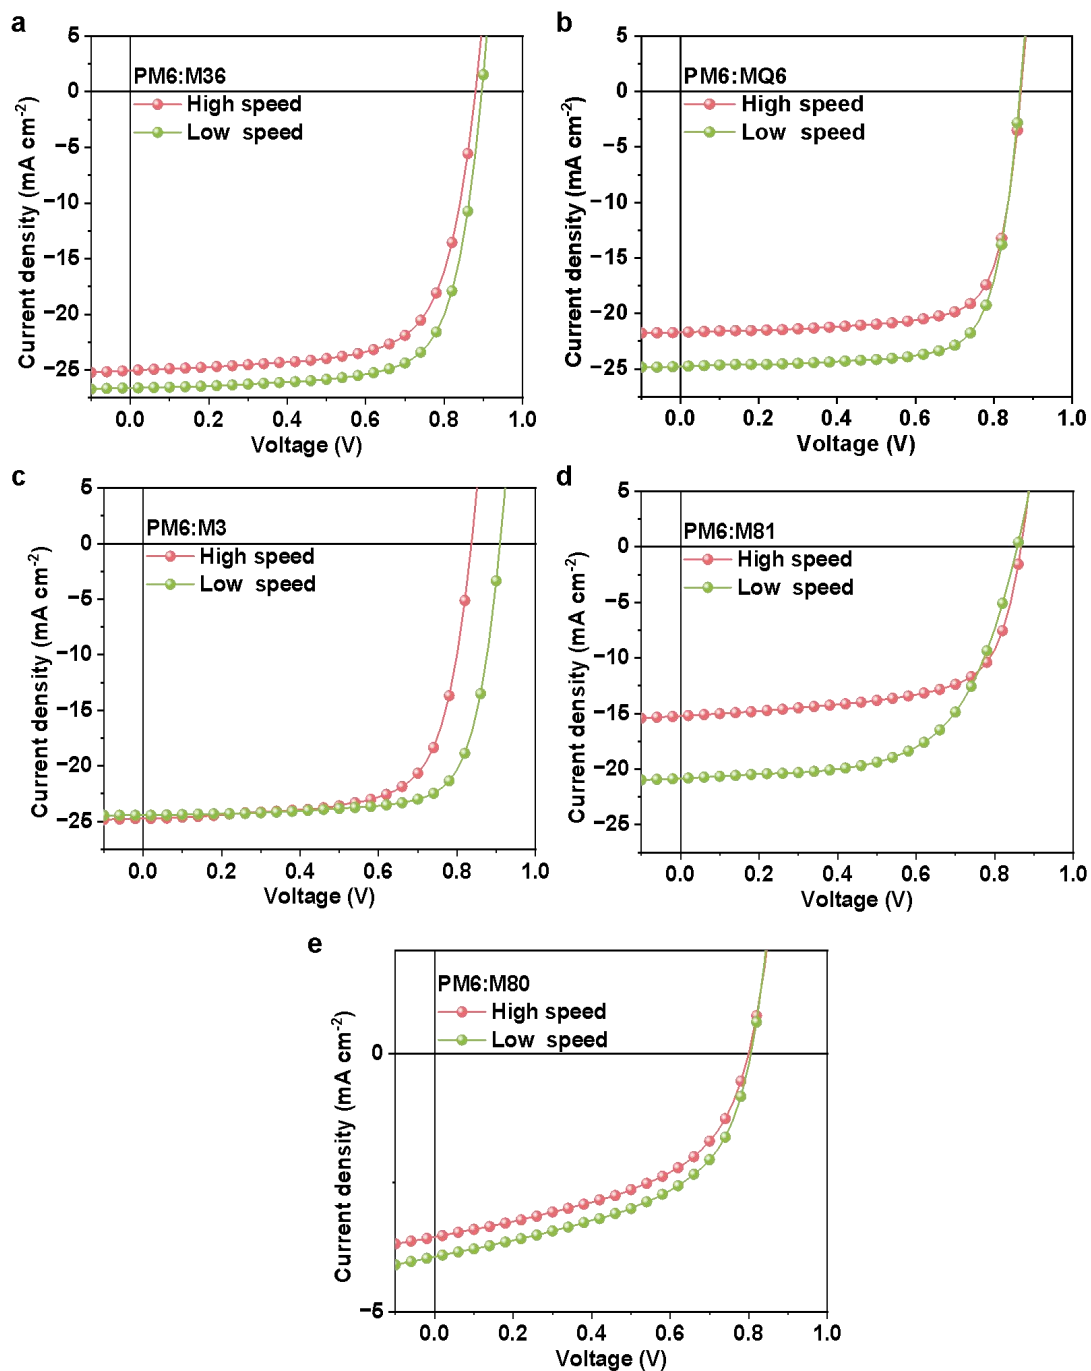

**Supplementary Fig. 7.**  $J$ - $V$  curves of the devices composed of PM6 as the donor and M3 series as the acceptor fabricated by low-speed and high-speed coating processes.



**Supplementary Table 3.** Summary of the PCE of the device of PM6:M3 series acceptors fabricated under normal speed and high speed.

| Acceptor | Speed<br>(m min <sup>-1</sup> ) | $V_{OC}$<br>(V) | $J_{SC}$<br>(mA cm <sup>-2</sup> ) | FF<br>(%) | PCE <sup>a</sup><br>(%) |
|----------|---------------------------------|-----------------|------------------------------------|-----------|-------------------------|
| M3       | 1.8                             | 0.909           | 24.44                              | 75.29     | 16.73 (16.26±0.47)      |
| M36      |                                 | 0.896           | 26.60                              | 72.70     | 17.32 (16.64±0.68)      |
| M80      |                                 | 0.805           | 3.94                               | 50.16     | 1.59 (1.37±0.22)        |
| M81      |                                 | 0.857           | 20.85                              | 61.19     | 10.93 (10.59±0.34)      |
| MQ6      |                                 | 0.867           | 24.78                              | 75.13     | 16.14 (16.00±0.13)      |
| M3       | 30.0                            | 0.837           | 24.74                              | 70.15     | 14.52 (14.37±0.15)      |
| M36      |                                 | 0.880           | 25.04                              | 69.67     | 15.34 (14.71±0.63)      |
| M80      |                                 | 0.800           | 3.55                               | 48.53     | 1.38 (0.84±0.54)        |
| M81      |                                 | 0.867           | 15.23                              | 65.92     | 8.70 (8.59±0.11)        |
| MQ6      |                                 | 0.869           | 21.70                              | 74.98     | 14.14 (13.79±0.35)      |

<sup>a</sup>The average PCE values with standard deviations were obtained from 10 independent cells.

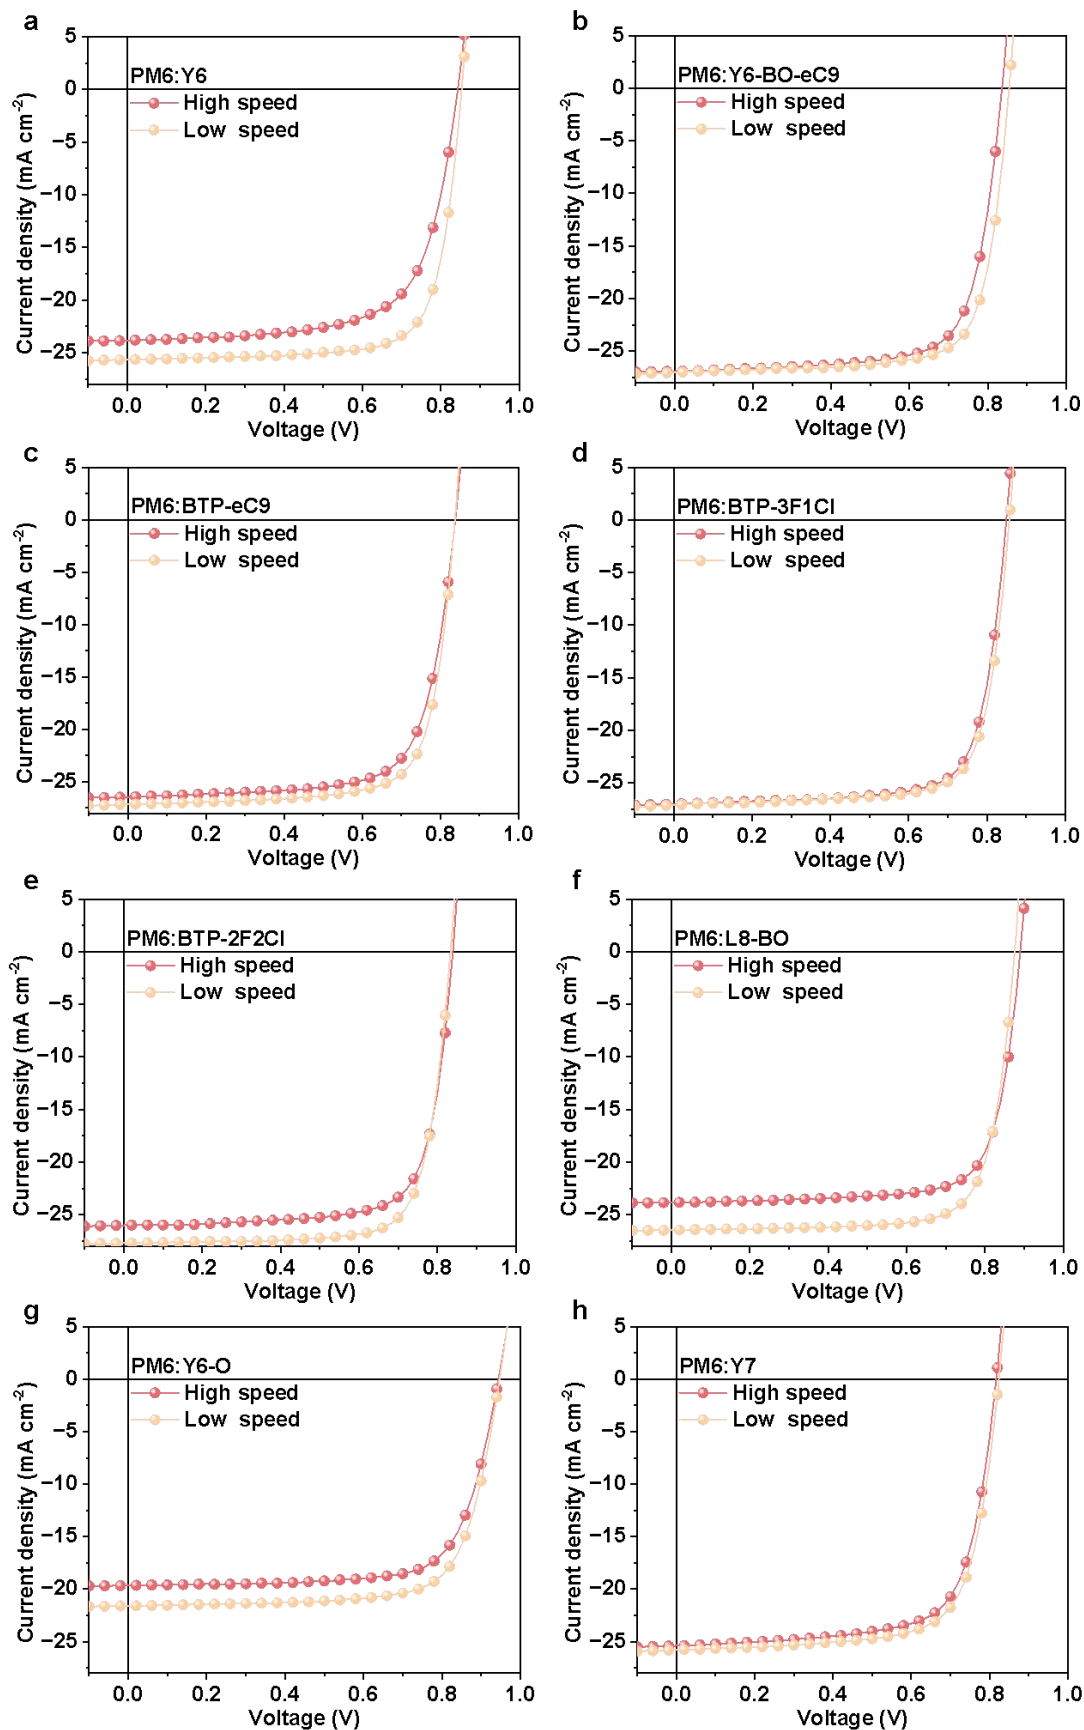

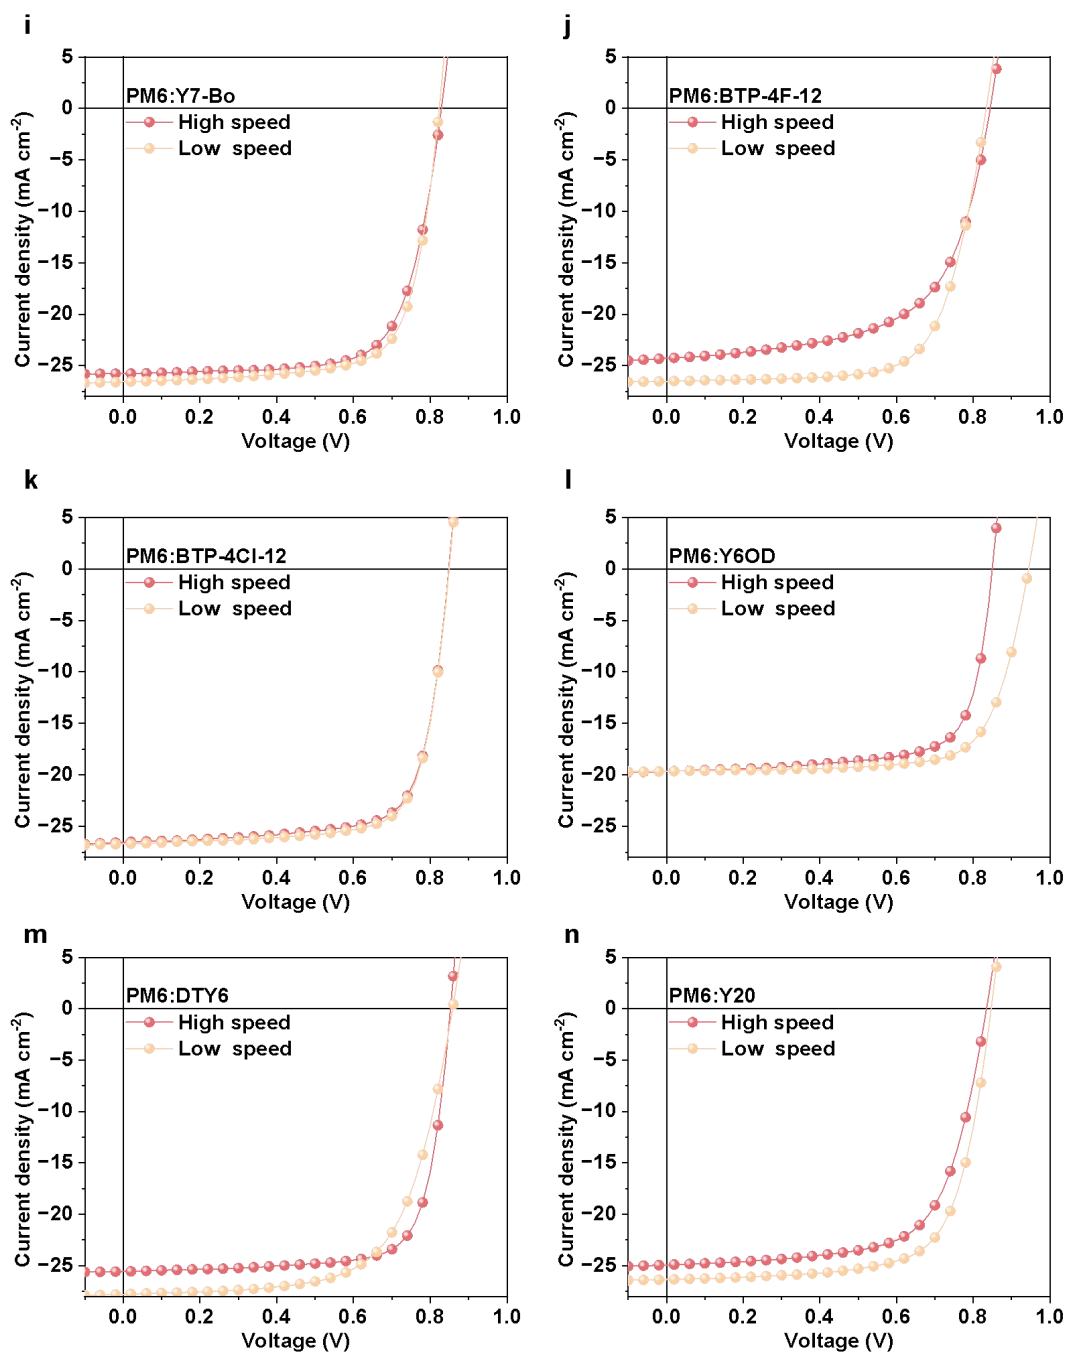

**Supplementary Fig. 8.**  $J$ - $V$  curves of the devices composed of PM6 as the donor and Y6 series as the acceptor and fabricated by low-speed and high-speed coating processes.

**Supplementary Table 4.** Summary of the PCE of the device of PM6:Y6 series acceptors fabricated under normal speed and high speed.

| Acceptor   | Speed<br>(m min <sup>-1</sup> ) | $V_{OC}$<br>(V) | $J_{SC}$<br>(mA cm <sup>-2</sup> ) | FF<br>(%) | PCE <sup>a</sup><br>(%) |
|------------|---------------------------------|-----------------|------------------------------------|-----------|-------------------------|
| Y6         | 1.8                             | 0.853           | 25.63                              | 75.59     | 16.53 (16.34±0.09)      |
| Y6-BO-eC9  |                                 | 0.855           | 27.02                              | 75.37     | 17.41 (16.82±0.59)      |
| BTP-eC9    |                                 | 0.850           | 27.29                              | 76.24     | 17.69 (17.55±0.14)      |
| BTP-3F1Cl  |                                 | 0.858           | 27.11                              | 75.64     | 17.59 (17.25±0.34)      |
| BTP-2F2Cl  |                                 | 0.837           | 27.15                              | 74.80     | 17.23 (17.11±0.12)      |
| L8-BO      |                                 | 0.876           | 26.47                              | 76.46     | 17.72 (17.53±0.19)      |
| Y6-O       |                                 | 0.947           | 21.58                              | 73.49     | 15.02 (14.81±0.21)      |
| Y7         |                                 | 0.824           | 25.78                              | 72.14     | 15.32 (14.69±0.63)      |
| Y7-BO      |                                 | 0.823           | 26.56                              | 72.26     | 15.80 (15.16±0.64)      |
| BTP-4F-12  |                                 | 0.834           | 26.51                              | 69.82     | 15.43 (15.27±0.16)      |
| BTP-4Cl-12 |                                 | 0.849           | 26.69                              | 74.13     | 16.80 (16.75±0.05)      |
| Y6-OD      |                                 | 0.865           | 23.58                              | 74.15     | 15.12 (14.65±0.47)      |
| DTY6       |                                 | 0.852           | 25.57                              | 75.59     | 16.48 (16.22±0.26)      |
| Y20        |                                 | 0.847           | 26.36                              | 70.19     | 15.66 (15.29±0.37)      |
| Y6         | 30.0                            | 0.843           | 23.83                              | 67.99     | 13.65 (13.43±0.12)      |
| Y6-BO-eC9  |                                 | 0.837           | 26.90                              | 73.19     | 16.47 (16.16±0.31)      |
| BTP-eC9    |                                 | 0.851           | 27.84                              | 73.51     | 17.41 (17.13±0.28)      |
| BTP-3F1Cl  |                                 | 0.850           | 27.00                              | 75.01     | 17.21 (16.77±0.43)      |
| BTP-2F2Cl  |                                 | 0.838           | 26.44                              | 72.06     | 15.96 (15.89±0.06)      |
| L8-BO      |                                 | 0.890           | 23.84                              | 75.72     | 16.06 (15.72±0.34)      |
| Y6-O       |                                 | 0.944           | 19.65                              | 72.88     | 13.52 (13.19±0.33)      |
| Y7         |                                 | 0.817           | 25.39                              | 70.85     | 14.69 (14.45±0.24)      |
| Y7-BO      |                                 | 0.829           | 25.77                              | 71.05     | 15.18 (15.04±0.13)      |
| BTP-4F-12  |                                 | 0.844           | 24.28                              | 60.95     | 12.49 (12.41±0.08)      |
| BTP-4Cl-12 |                                 | 0.848           | 26.54                              | 73.66     | 16.57 (16.18±0.39)      |
| Y6-OD      |                                 | 0.849           | 19.65                              | 72.77     | 12.15 (11.94±0.21)      |
| DTY6       |                                 | 0.858           | 27.79                              | 65.55     | 15.63 (15.15±0.48)      |
| Y20        |                                 | 0.834           | 24.93                              | 66.82     | 13.9 (13.84±0.06)       |

<sup>a</sup>The average PCE values with standard deviations were obtained from 10 independent cells.

**Supplementary Table 5.** Full names of acceptor material and corresponding code names and  $A_h$  value.

| Acceptor            | Mark  | $A_h$ | Average $A_h$ |
|---------------------|-------|-------|---------------|
| PCBM series         |       |       |               |
| PCBM                | S-F1  | 0.578 | 0.510         |
| ICBA                | S-F2  | 0.475 |               |
| PC <sub>71</sub> BM | S-F3  | 0.478 |               |
| ITIC series         |       |       |               |
| IT-4F               | S-T1  | 0.742 | 0.654         |
| ITIC                | S-T2  | 0.696 |               |
| IPIC                | S-T3  | 0.579 |               |
| ITTC                | S-T4  | 0.599 |               |
| M3 series           |       |       |               |
| M3                  | S-M1  | 0.868 | 0.859         |
| M36                 | S-M2  | 0.886 |               |
| M80                 | S-M3  | 0.867 |               |
| M81                 | S-M4  | 0.796 |               |
| MQ6                 | S-M5  | 0.876 |               |
| Y6 series           |       |       |               |
| Y6                  | S-Y1  | 0.845 | 0.917         |
| Y6-BO-eC9           | S-Y2  | 0.946 |               |
| BTP-eC9             | S-Y3  | 0.984 |               |
| BTP-3F1C1           | S-Y4  | 0.979 |               |
| BTP-2F2C1           | S-Y5  | 0.926 |               |
| L8-BO               | S-Y6  | 0.906 |               |
| Y6-O                | S-Y7  | 0.900 |               |
| Y7                  | S-Y8  | 0.959 |               |
| Y7-BO               | S-Y9  | 0.961 |               |
| BTP-4F-12           | S-Y10 | 0.809 |               |
| BTP-4C1-12          | S-Y11 | 0.986 |               |
| Y6-OD               | S-Y12 | 0.804 |               |
| DTY6                | S-Y13 | 0.948 |               |
| Y20                 | S-Y14 | 0.888 |               |

## Supplementary Note 1.

### *Simulation of fluid flow within the meniscus at various printing speeds:*

A two-dimensional model was built using COMSOL Multiphysics to simulate the fluid flow in the coating blade under two different coating speeds (1.8 m min<sup>-1</sup> and 30 m min<sup>-1</sup>). The solution was swept out by sheer force under the blade, and the movement of the substrate drove the flow of the solution. Considering computing power constraints and grid density. In this study, we only research the effect of coating speed on fluid flow distribution. Geometric parameters of blade edge in the model are measured from real blade used in this research, as shown in **Supplementary Table 6**.

Multiphase material including air and coating solution was used for flow calculation. The two-phase flow field driven by airflow physical and Laminar flow physical fields were used to simulate fluid flow.

In the laminar physical field, the fluid was modeled using the Navier-Stokes equations and was described as an incompressible Newtonian fluid as follows:

$$\rho \left[ \frac{\partial u}{\partial t} + (u \cdot \nabla)u \right] = -\nabla p + \nabla \cdot (\mu \nabla u) + F$$
$$\rho \nabla \cdot u = 0$$

where  $\rho$  is the liquid density,  $u$  is the velocity vector,  $p$  is the pressure,  $\mu$  is the viscosity, and  $F$  is the body force.

In the two-phase flow physical field, the evolution of phase boundary was modeled using the fluid dynamics and stresses formulas in a multi-phase system as follows:

$$F_{St} = \frac{2}{\rho_1 + \rho_2} \left( \rho_1 H \left( \frac{V_{f,1} - 0.5}{d_{s,F_{St}}} \right) + \rho_2 H \left( \frac{V_{f,2} - 0.5}{d_{s,F_{St}}} \right) \right) \left( \frac{\lambda}{\epsilon_{pf}^2} \psi - \frac{\partial f}{\partial \phi} \right) \nabla$$
$$V_{f,1} = \frac{1 - \phi}{2}, \quad V_{f,2} = \frac{1 + \phi}{2}, \quad V_{f,1} + V_{f,2} = 1$$

where  $F_{St}$  is the stress or force,  $\rho_1$  and  $\rho_2$  are the density of two flows,  $V_{f,1}$  and  $V_{f,2}$  are relevant volume fractions, the  $H$  function typically denotes a Heaviside step function,  $d_{s, F_{St}}$  is the characteristic dimension defined by the index flow property,  $\Phi$  is the stress

or displacement gradient between two flows,  $\epsilon_{pf}$  is a squared parameter related to permittivity or porosity,  $\lambda$  describes the interaction strength between different phases or components in the material.

As illustrated in **Supplementary Fig. 9**, the edge of the blade head and baseplate were set as the wetted wall. The black line were set as inlet and open boundary, respectively. To apply a shear force on the solution, the green line was set as a Navier slip wall with a slip speed that was equal to the coating speed. The place with a blue color shadow was filled by coating fluid in the initial condition. Simulation results were obtained by the combination of phase initialization and time-dependent study. The fluid flow at different printing speeds was calculated by parametric sweep. To emphasize the formation process of the wet film, the observation range was set in the blue dot line area. Corresponding press gradient data were extracted to highlight the most predominant wet film formation behavior.

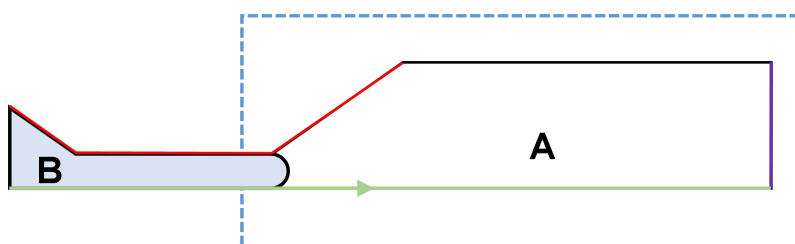

**Supplementary Fig. 9.** The wall and study regime in the simulation model.

**Supplementary Table 6.** The geometric parameters of the simulation model.

| Parameter | Value                    | Description          |
|-----------|--------------------------|----------------------|
| G         | 0.4 mm                   | Blade gap            |
| W         | 4 mm                     | Blade width          |
| E_u       | 45°                      | Upstream die angle   |
| E_d       | 45°                      | Downstream die angle |
| L_u       | 5 mm                     | Upstream length      |
| L_d       | 5 mm                     | Downstream length    |
| S_blade   | 0.03/5 m s <sup>-1</sup> | Coating speed        |
| S_in      | 0.03/5 m s <sup>-1</sup> | Inlet speed          |





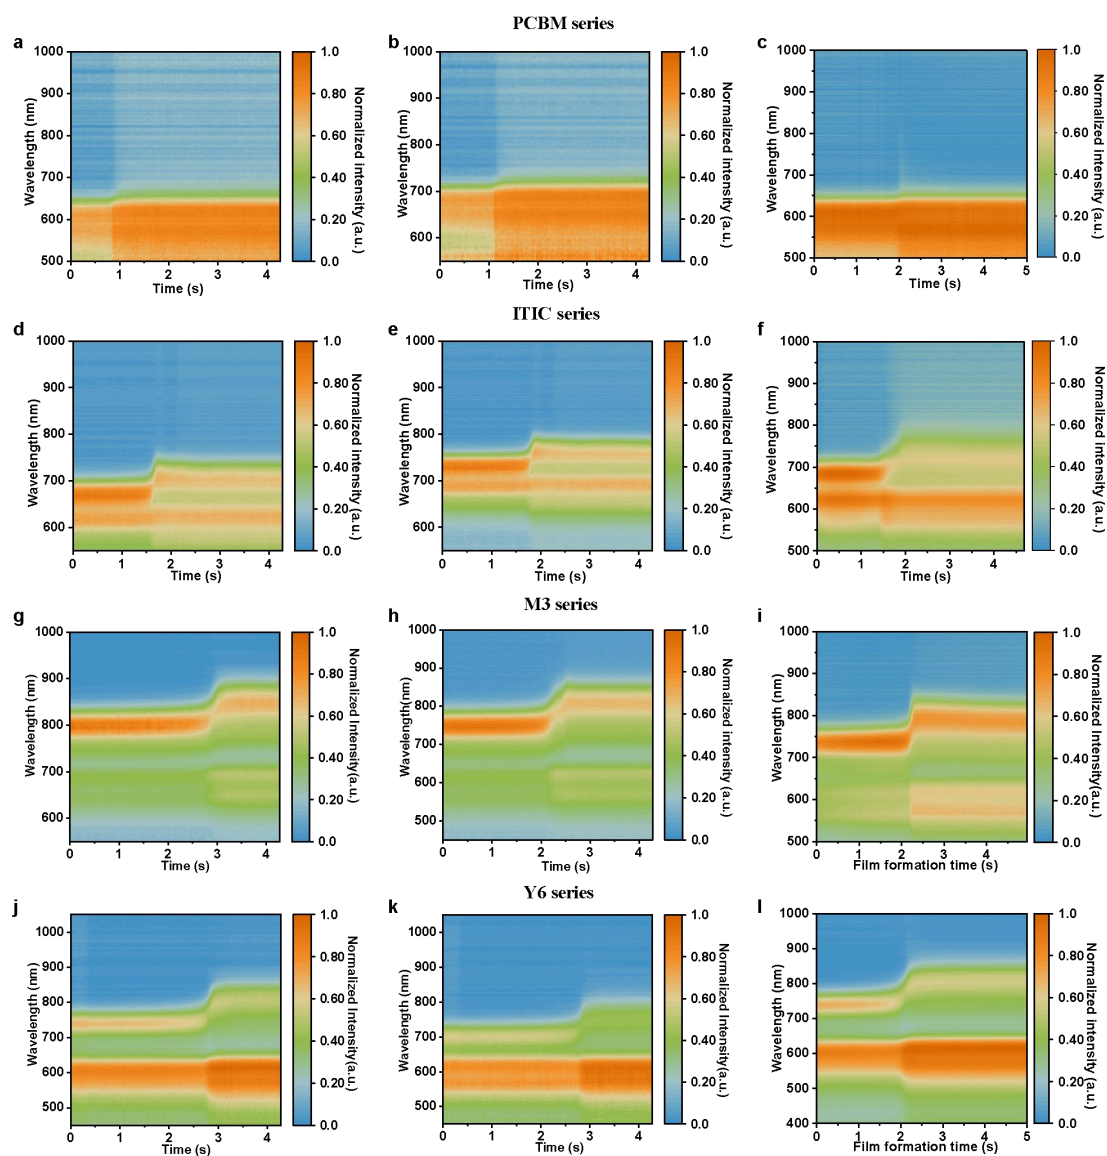

**Supplementary Fig. 10.** *In-situ* ultraviolet-visible (UV-vis) spectrum of blends of PM6:SMAs, the codes of acceptors were (a) S-F1, (b) S-F2, (c) S-F3, (d) S-T1, (e) S-T2, (f) S-T4, (g) S-M2, (h) S-M4, (i) S-M4, (j) S-Y6, (k) S-Y7 and (l) S-Y9, respectively.

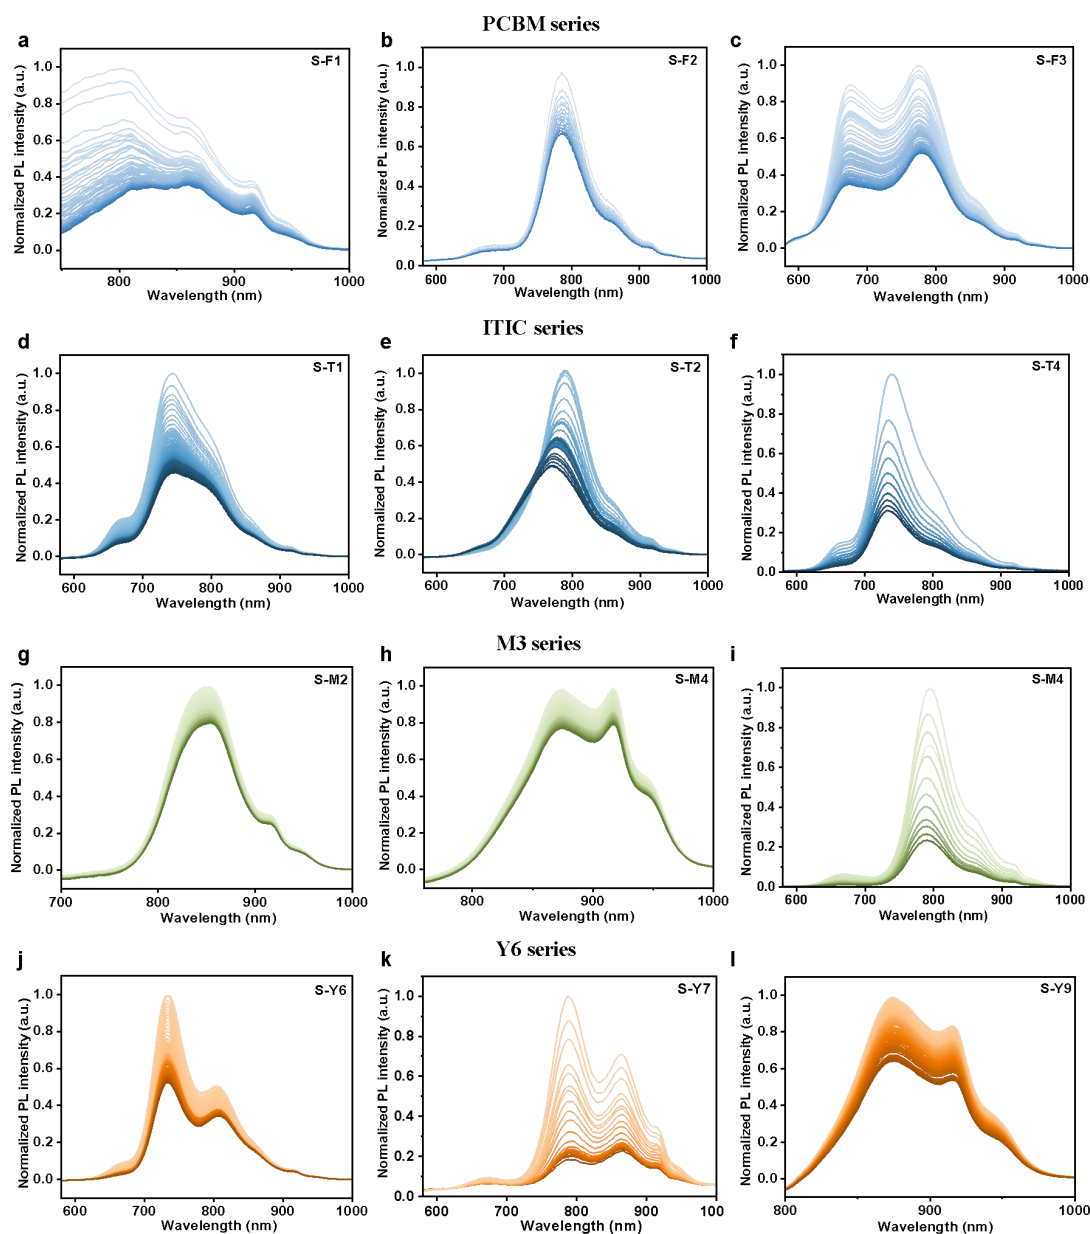

**Supplementary Fig.11.** *In-situ* photoluminescence (PL) spectrum of blends of PM6:SMAs, the codes of acceptors were (a) S-F1, (b) S-F2, (c) S-F3, (d) S-T1, (e) S-T2, (f) S-T4, (g) S-M2, (h) S-M4, (i) S-M4, (j) S-Y6, (k) S-Y7 and (l) S-Y9, respectively.

**Supplementary Table 7.** The HSP value of pure solvents and blends. The codes b-CH, b-CM, and b-CP mean the blends of chloroform and n-hexane, chloroform and methanol, chloroform, and propylene carbonate, respectively. The number behind the code means the percentage of poor solvent in blends, for example, b-CM7 means blend consisting of 30% chloroform and 70% methanol. HSP values of chloroform, *n*-hexane, methanol, and propylene carbonate are provided by the standard solvents' HSP list, while the HSP values of blends were calculated according to the linear rule.

| Solvents            | Dispersive (MPa <sup>1/2</sup> ) | Polar (MPa <sup>1/2</sup> ) | H-bond (MPa <sup>1/2</sup> ) |
|---------------------|----------------------------------|-----------------------------|------------------------------|
| chloroform          | 17.8                             | 3.1                         | 5.7                          |
| n-Hexane            | 14.9                             | 0                           | 0                            |
| methanol            | 14.7                             | 12.3                        | 22.3                         |
| propylene carbonate | 20                               | 18                          | 4.1                          |
| b-CH1               | 17.51                            | 2.79                        | 5.13                         |
| b-CH2               | 17.22                            | 2.48                        | 4.56                         |
| b-CH3               | 16.93                            | 2.17                        | 3.99                         |
| b-CH4               | 16.64                            | 1.86                        | 3.42                         |
| b-CH5               | 16.35                            | 1.55                        | 2.85                         |
| b-CH6               | 16.06                            | 1.24                        | 2.28                         |
| b-CH7               | 15.77                            | 0.93                        | 1.71                         |
| b-CH8               | 15.48                            | 0.62                        | 1.14                         |
| b-CH9               | 15.19                            | 0.31                        | 0.57                         |
| b-CM1               | 17.49                            | 4.02                        | 7.36                         |
| b-CM2               | 17.18                            | 4.94                        | 9.02                         |
| b-CM3               | 16.87                            | 5.86                        | 10.68                        |
| b-CM4               | 16.56                            | 6.78                        | 12.34                        |
| b-CM5               | 16.25                            | 7.7                         | 14                           |
| b-CM6               | 15.94                            | 8.62                        | 15.66                        |
| b-CM7               | 15.63                            | 9.54                        | 17.32                        |
| b-CM8               | 15.32                            | 10.46                       | 18.98                        |
| b-CM9               | 15.01                            | 11.38                       | 20.64                        |
| b-CP1               | 18.02                            | 4.59                        | 5.54                         |
| b-CP2               | 18.24                            | 6.08                        | 5.38                         |
| b-CP3               | 18.46                            | 7.57                        | 5.22                         |
| b-CP4               | 18.68                            | 9.06                        | 5.06                         |
| b-CP5               | 18.9                             | 10.55                       | 4.9                          |
| b-CP6               | 19.12                            | 12.04                       | 4.74                         |
| b-CP7               | 19.34                            | 13.53                       | 4.58                         |
| b-CP8               | 19.56                            | 15.02                       | 4.42                         |
| b-CP9               | 19.78                            | 16.51                       | 4.26                         |

**Supplementary Table 8.** The HSP value of pure solvents and binary solvent.

| Acceptor | Dispersive<br>(MPa <sup>1/2</sup> ) | Polar<br>(MPa <sup>1/2</sup> ) | H-bond<br>(MPa <sup>1/2</sup> ) | R <sub>0</sub><br>(MPa <sup>1/2</sup> ) | D <sub>SA</sub><br>(MPa <sup>1/2</sup> ) | D <sub>AD</sub><br>(MPa <sup>1/2</sup> ) | P <sub>dc</sub><br>(×10 <sup>-2</sup> ) |
|----------|-------------------------------------|--------------------------------|---------------------------------|-----------------------------------------|------------------------------------------|------------------------------------------|-----------------------------------------|
| S-F1     | 17.04                               | 4.96                           | 7.89                            | 4.9                                     | 3.68                                     | 5.83                                     | -3.33                                   |
| S-F2     | 16.49                               | 4.41                           | 7.82                            | 5.1                                     | 4.00                                     | 6.27                                     | -5.42                                   |
| S-F3     | 16.77                               | 4.7                            | 8.08                            | 4.8                                     | 3.96                                     | 6.20                                     | -8.07                                   |
| S-T1     | 16.74                               | 3.87                           | 7.07                            | 4.2                                     | 2.99                                     | 5.32                                     | -0.55                                   |
| S-T2     | 16.49                               | 4.41                           | 7.82                            | 4.5                                     | 4.00                                     | 6.27                                     | -11.78                                  |
| S-T3     | 16.75                               | 4.29                           | 7.53                            | 5.4                                     | 3.43                                     | 5.71                                     | 5.59                                    |
| S-M3     | 16.98                               | 5.23                           | 7.01                            | 5.6                                     | 3.30                                     | 5.25                                     | 10.18                                   |
| S-M4     | 16.4                                | 3.62                           | 6.49                            | 4.9                                     | 3.17                                     | 5.36                                     | 4.64                                    |
| S-M5     | 16.68                               | 3.51                           | 5.22                            | 4.1                                     | 2.28                                     | 4.13                                     | 13.85                                   |
| S-Y3     | 17.4                                | 4.99                           | 4.17                            | 5                                       | 2.25                                     | 2.76                                     | 39.50                                   |
| S-Y10    | 17.3                                | 5.17                           | 5.87                            | 5.02                                    | 2.42                                     | 4.02                                     | 23.78                                   |
| S-Y15    | 17.2                                | 4.1                            | 4.73                            | 4.4                                     | 1.61                                     | 3.05                                     | 44.47                                   |

Note: Dispersive, Polar, H-bond are the dispersive force, polar force and H-bond force component of cohesion energy, respectively. R<sub>0</sub> is the radius of solute sphere, D<sub>SA</sub> is the HSP space distance between the solvent and acceptor, D<sub>AD</sub> is the HSP space distance between the donor and acceptor, P<sub>dc</sub> is defined as the priority of donor crystallization during the film formation process.

## Supplementary Note 2.

### ***Hansen Solubility Parameters:***

Gradient measurement<sup>23</sup> was employed to determine the HSP (Hansen Solubility Parameters) point coordinates (H-bond, Polar, Dispersive components) and the radius of the solubility sphere. We utilized three groups of good solvent-poor solvent blends as test solvents (Chloroform: n-Hexane, Chloroform: Methanol, and Chloroform: Propylene Carbonate). Each group consisted of 9 mixed solvents, starting from pure chloroform, with the poor solvent gradually introduced at 10% volume fraction increments, until the poor solvent reached 90% of the total volume. The HSP points of the resulting mixed solvents will follow a linear rule in HSP space, forming a claw-like pattern. The target acceptor material is soluble in chloroform, and by scanning in three distinct directions in HSP space, the solubility radius, and center can be determined with greater precision than typically achieved with conventional solvent mixtures. Considering the minimum concentration of dilute solutions suitable for high-speed processing is typically around 5 mg mL<sup>-1</sup>, we used this value as the threshold to define “soluble” and “poorly soluble” states.

### ***Donor-acceptor-solvent triangle model and Calculation of $P_{dc}$ Value:***

In this article, an HSP model was established to calculate the donor-acceptor-solvent triangle relationship and corresponding crystal behavior during the crystallization stage in film formation process. The corresponding module illustration and parameters are listed below.

**Supplementary Table 9.** The parameters list of HSP triangle model.

| Parameter       | Description                                                |
|-----------------|------------------------------------------------------------|
| $P_{dc}$        | The priority of donor crystallization                      |
| $R_0$           | The solute sphere radius of the solute                     |
| $D_{DA}$        | The HSP space distance between the donor and acceptor      |
| $D_{SA}/D_{SD}$ | The HSP space distance between solvent and acceptor/ donor |
| $R_A/R_D$       | The solute sphere radius of the acceptor/ donor            |
| $RED_A/RED_D$   | The relative energy differences of the acceptor/ donor     |

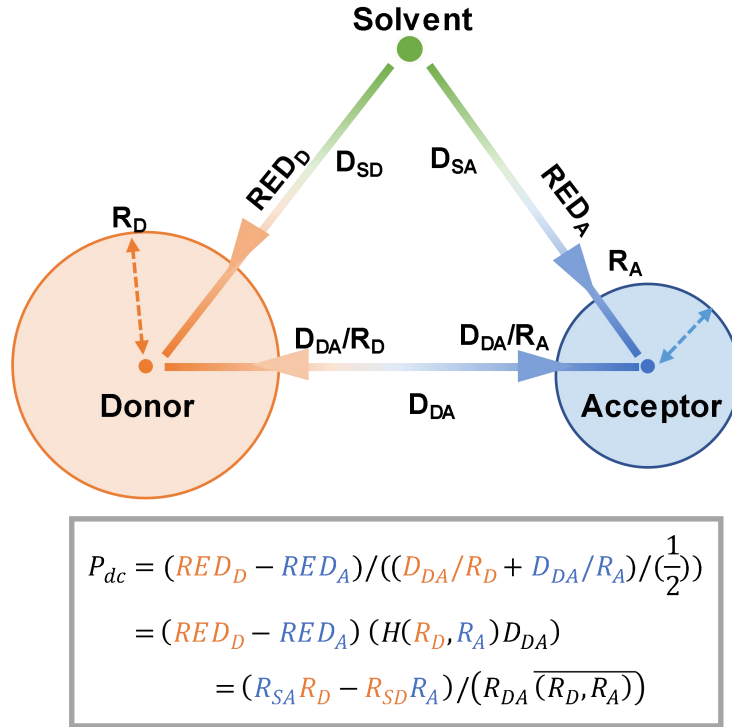

**Supplementary Fig. 12.** The D-A-solvent triangle and the corresponding parameters.

According to formula  $Difference^2 = 2.046^2(\delta D_A - \delta D_B)^2 + (\delta P_A - \delta P_B)^2 + (\delta H_A - \delta H_B)^2$  given in the HSP guidebook, each solute/solvent can be determined as a point in the HSP 3D space, in this work, we define their point position as a vector  $P_x$ , and the difference between two solutes can be regarded as Euclidean distance between two vectors. For the solute point, as the set of boundary concentration, a soluble edge was attached to the solute in HSP space, the solute point was transformed into the solute sphere, and the radius of the sphere was used to measure the solute's inclusiveness to the solute. For a certain kind of solvent, we used the RED value (The solute-solvent point distance divided by the solute sphere radius) to compare the crystallization priority of different acceptors in the same solvents. By extension, the miscibility behavior of the donor and acceptor was accounted for by the solute-solvent point distance divided by the solute sphere radius. The explanation above can be summarized in the formula below:

$$\begin{aligned}
 P_X &= (2.046\delta D_X, \delta P_X, \delta H_X) \\
 D_{SX} &= ||P_S - P_X|| \\
 RED_X &= D_{SX}/R_X
 \end{aligned}$$

in which  $\delta D_X, \delta P_X, \delta H_X$  mean dispersion, polar and H- Bonding, respectively.

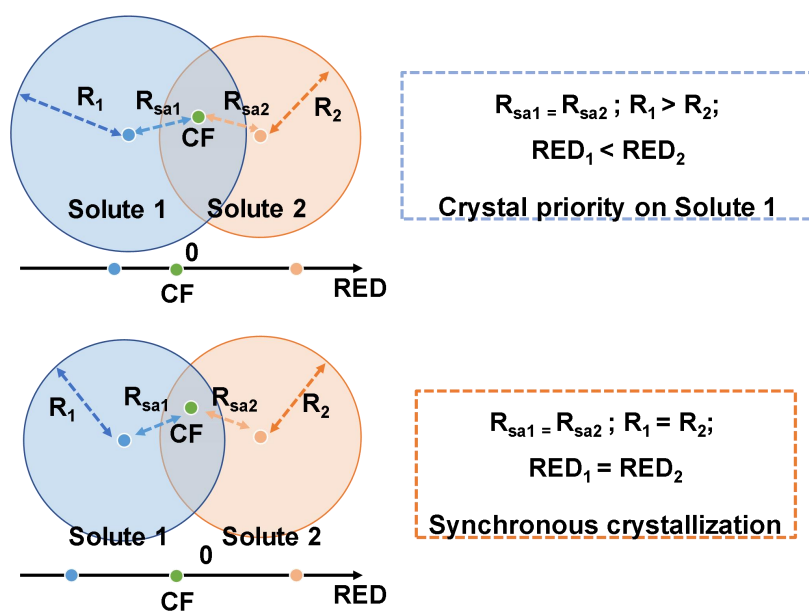

**Supplementary Fig. 13.** The relationship between RED values difference between two solutes, and corresponding crystallization sequence.

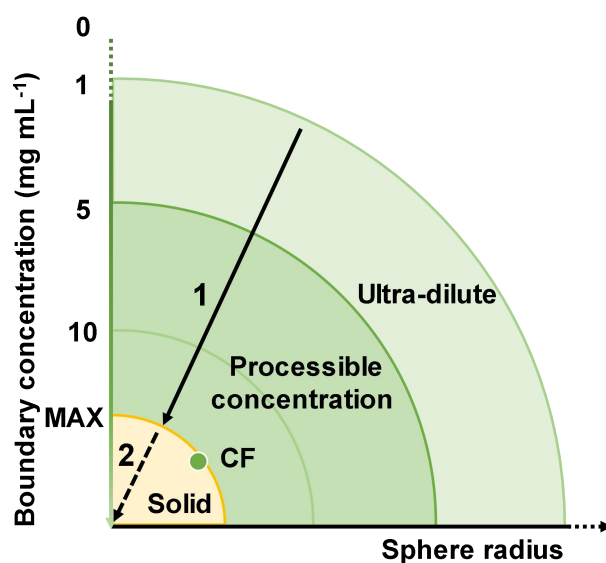

**Supplementary Fig. 14.** The relationship between solute sphere radius and boundary concentration. The higher the defined boundary concentration, the smaller the radius of the solute sphere. When the boundary concentration is set to 0, all solvents behave as good solvents, causing the radius of the solute sphere to become infinite. **Arrow 1:** During the crystallization process, the concentration of the solution increases steadily, and the radius corresponding to the actual concentration shifts in the direction indicated by the arrows in the figure. **Arrow 2:** the solute sphere's surface reaches chloroform at the corresponding concentration, and the solution concentration reaches saturation concentration, resulting in the formation of a solid phase. At this point, the integration sphere continues to contract inward. In solutions where solid and liquid phases coexist, chloroform acts as a poor solvent.



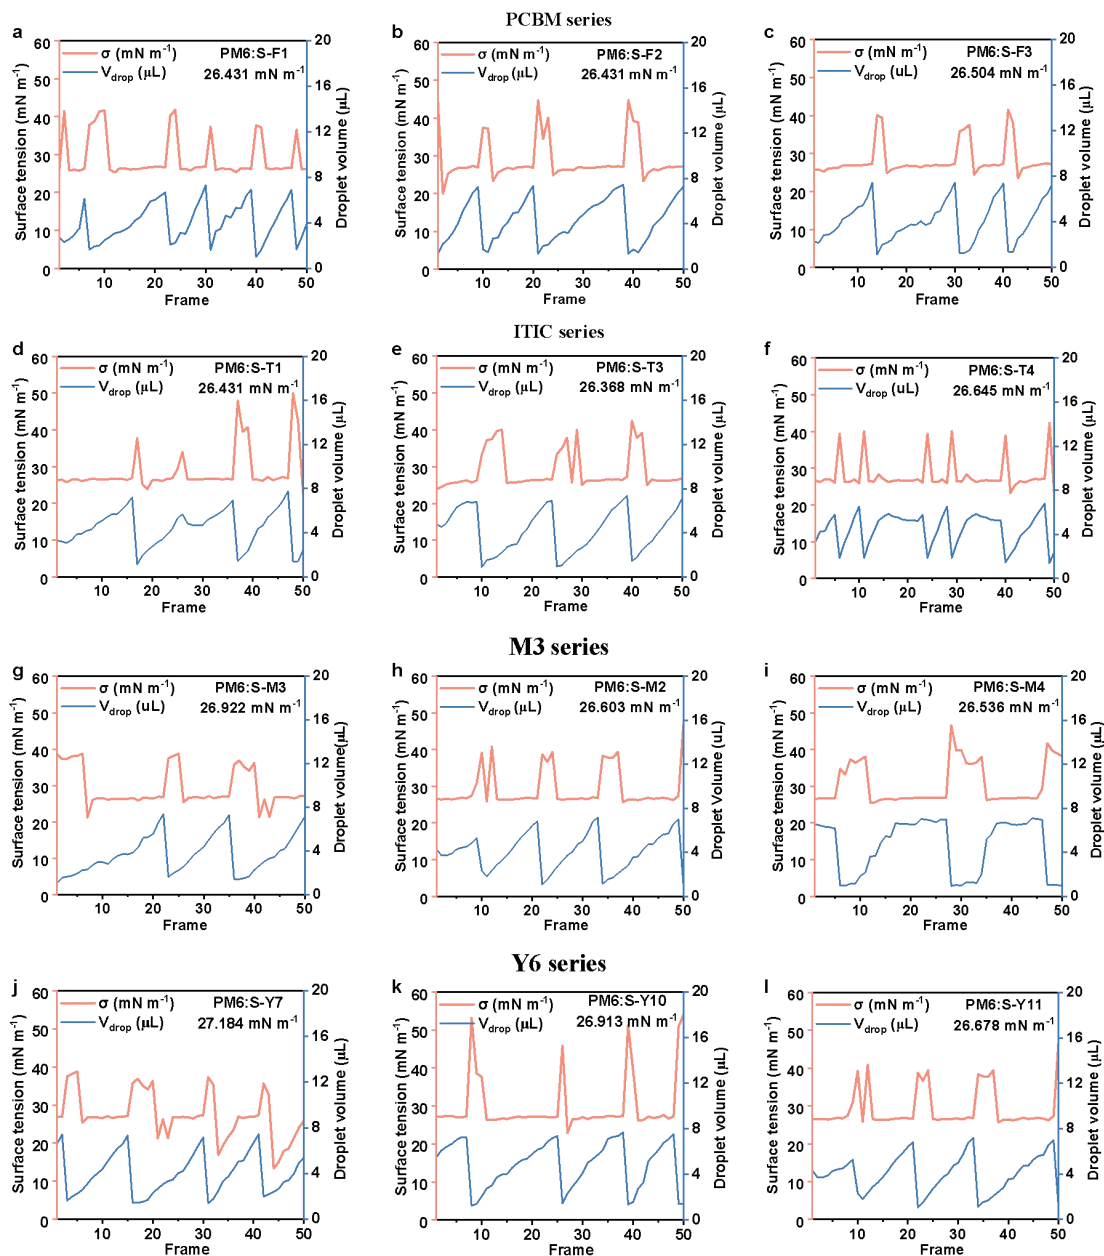

**Supplementary Fig. 15.** The evolution of the surface tension and droplet volume of PM6: acceptor solutions, the codes of acceptors were (a) S-F1, (b) S-F2, (c) S-F3, (d) S-T1, (e) S-T3, (f) S-F4, (g) S-M2, (h) S-M3, (i) S-M4, (j) S-Y7, (k) S-Y10 and (l) S-Y11, respectively.

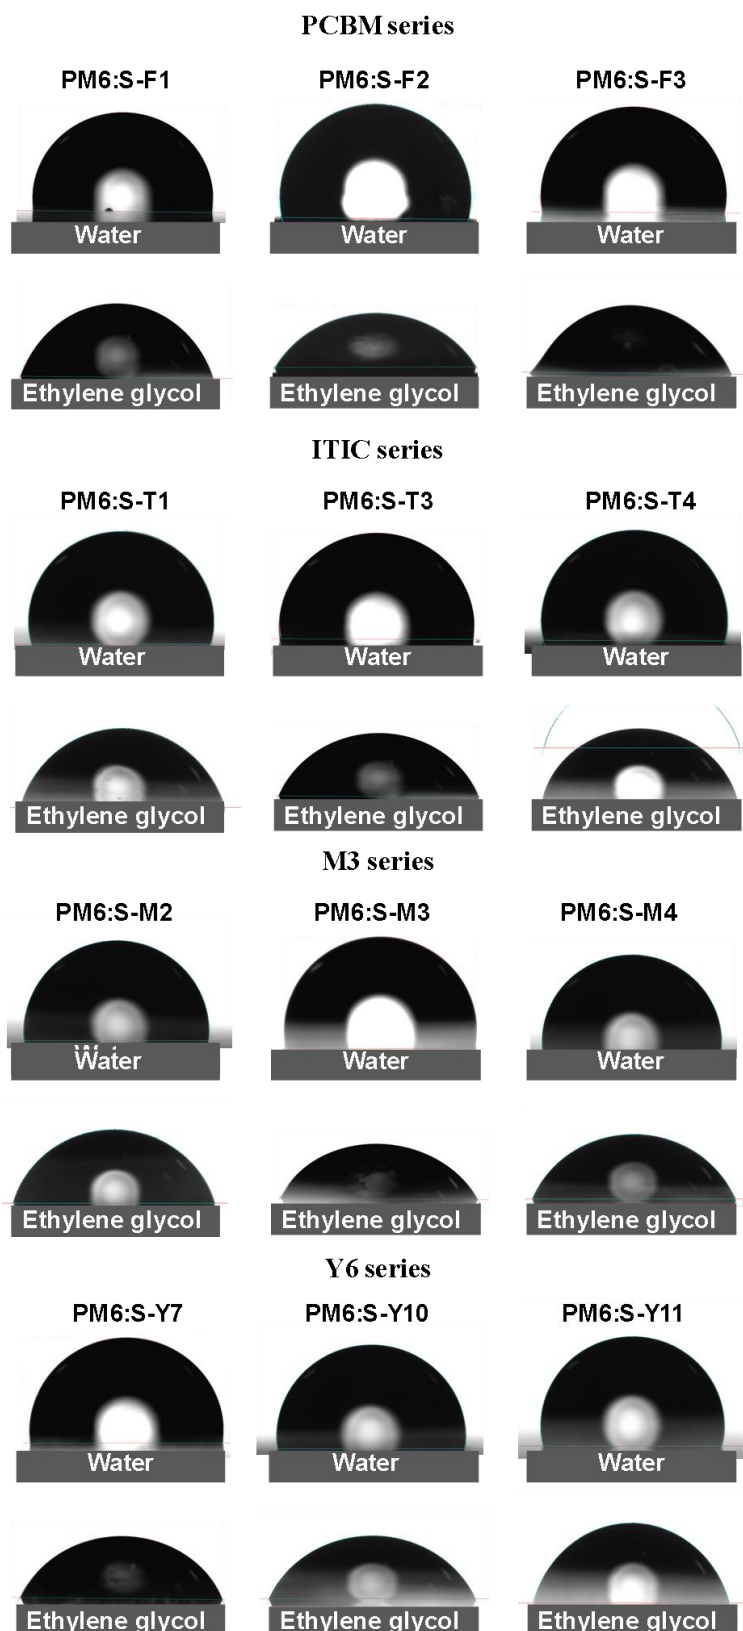

**Supplementary Fig. 16.** Photographs of deionized water and ethylene glycol droplets on the top surfaces of PM6:S-F1, PM6:S-F2, PM6:S-F3, PM6:S-T1, PM6:S-T3, PM6:S-F4, PM6:S-M2, PM6:S-M3, PM6:S-M4, PM6:S-Y7, PM6:S-Y10, and PM6:S-Y11. The measurement is conducted at the center of the substrates.

**Supplementary Table 10.** Investigations of the contact angles and surface energy values of solid films of PM6:S-F1, PM6:S-F3, PM6:S-T1, PM6:S-T3, PM6:S-M2, PM6:S-M4, PM6:S-Y10 and PM6:S-Y11.

| Sample     | Contact angle (°) |                 | Surface energy<br>(mN m <sup>-1</sup> ) |
|------------|-------------------|-----------------|-----------------------------------------|
|            | Water             | Ethylene glycol |                                         |
| PM6: S-F1  | 99.82             | 61.53           | 27.84                                   |
| PM6: S-F2  | 99.51             | 72.54           | 27.48                                   |
| PM6: S-F3  | 93.29             | 70.62           | 22.56                                   |
| PM6: S-T1  | 103.53            | 76.03           | 31.15                                   |
| PM6: S-T3  | 106.03            | 71.90           | 30.83                                   |
| PM6: S-M2  | 97.30             | 66.96           | 36.98                                   |
| PM6: S-M3  | 98.34             | 67.11           | 34.89                                   |
| PM6: S-M4  | 96.10             | 74.32           | 35.92                                   |
| PM6: S-Y7  | 100.34            | 67.11           | 38.74                                   |
| PM6: S-Y10 | 98.80             | 66.30           | 41.86                                   |
| PM6: S-Y11 | 104.23            | 73.24           | 38.80                                   |

**Supplementary Table 11.** Summary of surface energy values of solid films and solutions of PM6:S-F1, PM6:S-F3, PM6:S-T1, PM6:S-T3, PM6:S-M2, PM6:S-M4, PM6:S-Y10 and PM6:S-Y11, and corresponding calculated spread force.

| Sample     | Two-phase Tension (mN m <sup>-1</sup> ) |            | Spread Force (mN m <sup>-1</sup> ) |
|------------|-----------------------------------------|------------|------------------------------------|
|            | Solid-Gas                               | Liquid-Gas |                                    |
| PM6: S-F1  | 27.84                                   | 26.43      | 1.41                               |
| PM6: S-F2  | 26.41                                   | 27.48      | -1.07                              |
| PM6: S-F3  | 22.56                                   | 26.50      | -3.94                              |
| PM6: S-T1  | 31.15                                   | 26.48      | 4.67                               |
| PM6: S-T3  | 30.83                                   | 26.37      | 4.46                               |
| PM6: S-T4  | 31.56                                   | 26.65      | 4.91                               |
| PM6: S-M2  | 36.98                                   | 26.92      | 10.06                              |
| PM6: S-M3  | 34.89                                   | 26.60      | 8.29                               |
| PM6: S-M4  | 35.92                                   | 26.54      | 9.38                               |
| PM6: S-Y7  | 38.74                                   | 27.18      | 11.56                              |
| PM6: S-Y10 | 41.86                                   | 26.91      | 10.57                              |
| PM6: S-Y11 | 38.80                                   | 26.68      | 12.37                              |

### Supplementary Note 3.

**Saturation concentration measurement:** The saturation concentration of solution can be calculated by analyzing the solution PL intensity as a function of heating-evaporation time.

The solution photoluminescence spectrum intensity can be calculated by:

$$I_{\text{PL}}(\lambda) = \eta_{\text{PL}} \cdot \Phi_{\text{abs}}(\lambda) \cdot I_{\text{exc}}(\lambda) \cdot L \cdot C$$

where the  $\eta_{\text{PL}}$  is photoluminescence quantum efficiency, representing the probability of emitting one photon per absorbed photon,  $\Phi_{\text{abs}}(\lambda)$  is the flux of absorbed photons at wavelength  $\lambda$ ,  $I_{\text{exc}}(\lambda)$  is the absorbed photon flux can be expressed in terms of the absorbance  $A(\lambda)$ ,  $L$  is the path length of the sample, typically the thickness of the cuvette or sample holder,  $C$  is the concentration of a solution.

For a series of solutions of different concentrations of the same acceptor mounted in the same size quartz dish, the first four parameters are consistency. We can get the relationship below:

$$I_{\text{PL}}(\lambda) \propto C$$

We can calculate the solution concentration by PL spectrum peak intensity in controlled conditions. Thus, in this measurement, solutions of different acceptors at a concentration of 20 mg mL<sup>-1</sup> are prepared, record the PL intensity of solutions is diluted 1000 times, thereby they are placed openly on a hotplate at a temperature of 45 °C to evaporate the solvent and concentrate solution. Every 2 min, remove the solution from the hotplate and still it for 5 minutes, then pipette the upper solution and measure the PL intensity of solutions diluted 1000 times. The test operation above can be terminated after the peak remains stable three times.

Finally, the saturation concentration can be calculated by:

$$C_{sat} = \frac{20I_{fi}}{I_{in}}$$

Where  $I_{fi}$  is the final PL spectrum intensity,  $I_{in}$  is the PL spectrum intensity of solution at a concentration of 20 mg mL<sup>-1</sup>.

**Dynamic pendant drop measurements:** The pendant drop silhouette images were instantaneously captured, by which the surface tension was calculated with below Young-Laplace equation below in real-time:

$$\gamma = \frac{\Delta\rho g D_e^2}{H},$$

$$\frac{1}{H} = f \frac{D_s}{D_E},$$

Where  $\gamma$  denotes the surface tension of the solution,  $\Delta\rho$  denotes the density difference between the solution and air,  $g$  represents a gravitational constant,  $D_e$  denotes the maximum diameter of the pendant drop,  $D_s$  denotes the diameter at the height of  $D_e$ , and  $H$  represents a shape factor of the pendant drop, which can be calculated with two parameters of  $D_e$  and  $D_s$  from the images and a correction constant off. To prevent surface crystallization, the solution was continuously and slowly injected into the droplet, the geometry of the threshold volume droplet will stabilize briefly before dropping, corresponding calculated value is the intrinsic surface tension.

All corresponding data in this work were measured under a controlled atmosphere with 25 °C and 38% humidity to exclude the air's influence on the evaporation rate.

**Spread force calculation:** In this study, the spreading force at the three-phase contact point was calculated using the equation:

$$F_{spread} = \sigma_{sg} - \sigma_{ls} - \sigma_{lg}\cos\theta$$

Where  $F_{spread}$  represents the resultant force of the three interfacial tensions at the three-phase contact point,  $\sigma_{sg}$  is the solid-gas interfacial tension,  $\sigma_{ls}$  is the liquid-solid interfacial tension, and  $\sigma_{lg}$  is the liquid-gas interfacial tension. The variable denotes

the contact angle between the liquid film's edge and the solid phase at the three-phase contact point. Given that the wet film thickness during actual processing is negligible compared to the device size, we assume the contact angle and  $\sigma_{ls}$ , which are approximately 0. Additionally, since the solution near the solid phase interface is close to a semi-solid state, we ensure that the value of  $\sigma_{ls}$  is constant. In this work, we focus on comparing the changes in the resultant force caused by variations in the solid-gas and liquid-gas interfacial tensions:

$$F_s = F_{spread} + \sigma_{ls} = \sigma_{sg} - \sigma_{lg}$$

The surface tension of the solid-gas interface is obtained via contact angle measurements, while the surface tension of the solution-gas interface is measured using the dynamic pendant drop method.

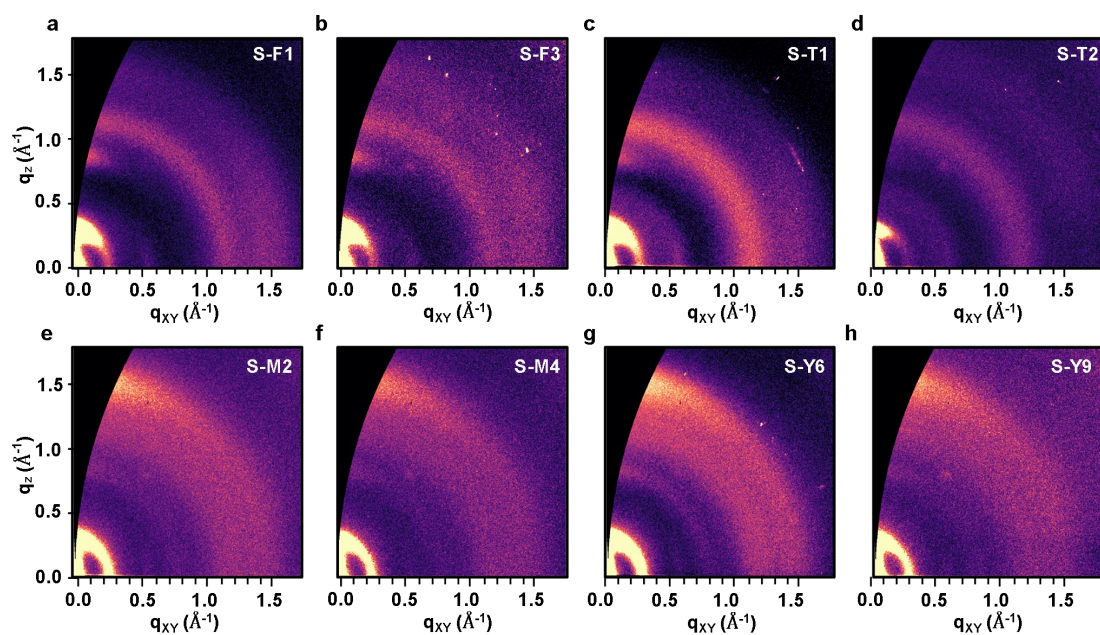

**Supplementary Fig. 17.** The GIWAXs figures of PM6:(a) S-F1, (b) S-F2, (c) S-T1, (d) S-T2, (e) S-M2, (f) S-M4, (g) S-Y6, (h) S-Y9 film fabricated by low speed.



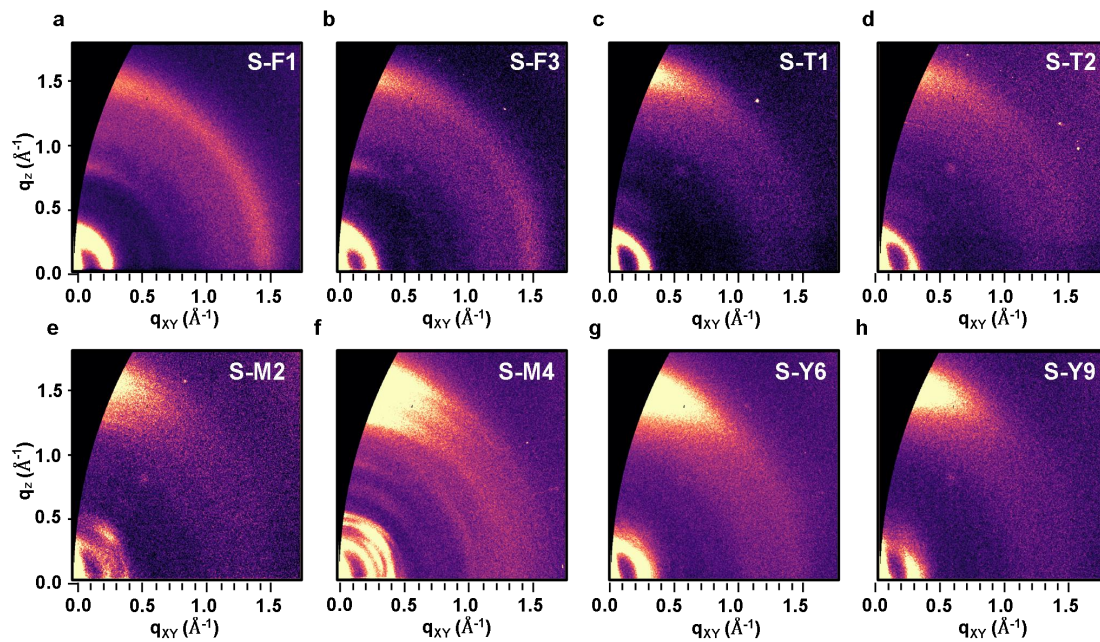

**Supplementary Fig. 18.** The GIWAXs figures of PM6:(a) S-F1, (b) S-F2, (c) S-T1, (d) S-T2, (e) S-M2, (f) S-M4, (g) S-Y6, (h) S-Y9 film fabricated by low speed.

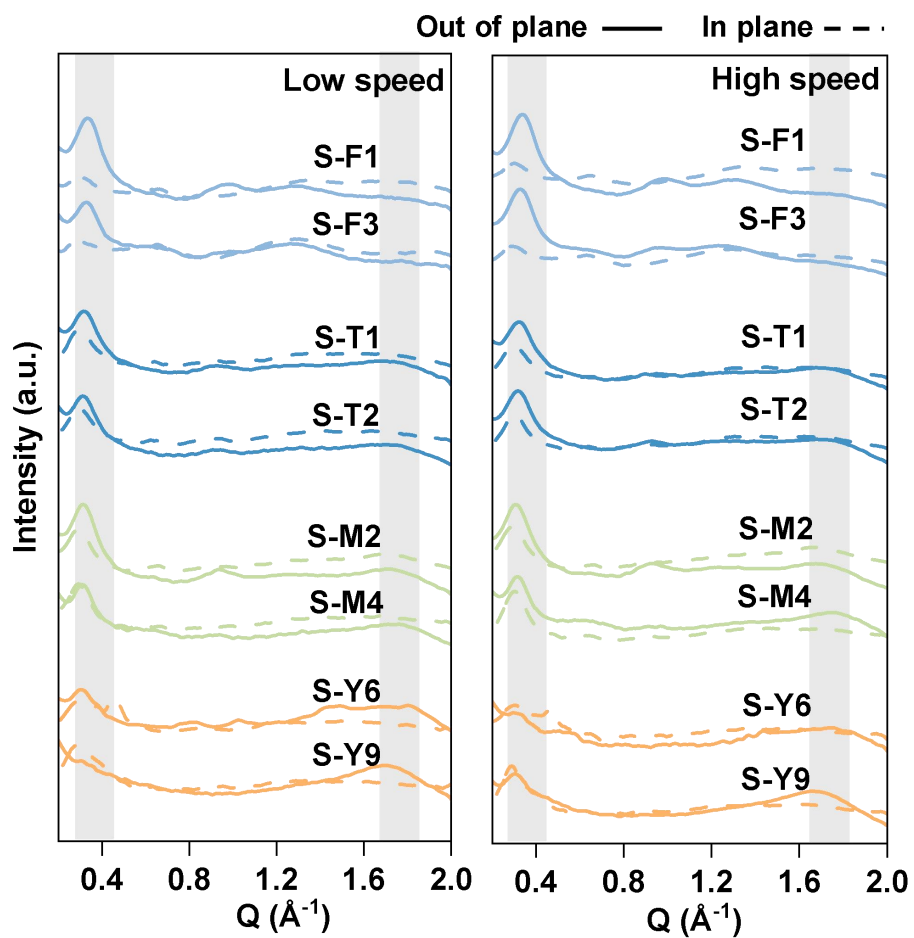

**Supplementary Fig. 19.** The GIWAXS figures of PM6:S-F1, S-F2, S-T1, S-T2, S-M2, S-M4, S-Y6, S-Y9 film fabricated by low speed and high speed.

**Supplementary Table 12.** Summarized parameters of PPM6:S-F1, S-F2, S-T1, S-T2, S-M2, S-M4, S-Y6, S-Y9 film fabricated by low speed and high speed. calculated from 1D-GIWAXS scattering profiles

| Speed | Sample    | Out-of-plane (OOP)           |                                  |                               |             | In-plane (IP)                |                                  |
|-------|-----------|------------------------------|----------------------------------|-------------------------------|-------------|------------------------------|----------------------------------|
|       |           | $q$<br>( $\text{\AA}^{-1}$ ) | $d$ -spacing<br>( $\text{\AA}$ ) | FWHM<br>( $\text{\AA}^{-1}$ ) | CCL<br>(nm) | $q$<br>( $\text{\AA}^{-1}$ ) | $d$ -spacing<br>( $\text{\AA}$ ) |
| Low   | PM6: S-F1 | 1.292                        | 4.863                            | 0.386                         | 29.230      | 0.295                        | 21.306                           |
|       | PM6: S-F3 | 1.263                        | 4.976                            | 0.365                         | 30.986      | 0.296                        | 21.198                           |
|       | PM6: S-T1 | 1.688                        | 3.723                            | 0.360                         | 31.416      | 0.302                        | 20.840                           |
|       | PM6: S-T2 | 1.690                        | 3.717                            | 0.345                         | 32.782      | 0.296                        | 21.198                           |
|       | PM6: S-M2 | 1.708                        | 3.680                            | 0.290                         | 30.060      | 0.288                        | 21.786                           |
|       | PM6: S-M4 | 1.758                        | 3.575                            | 0.230                         | 39.173      | 0.293                        | 21.452                           |
|       | PM6: S-Y6 | 1.720                        | 3.653                            | 0.325                         | 34.800      | 0.286                        | 21.977                           |
|       | PM6: S-Y9 | 1.695                        | 3.707                            | 0.260                         | 32.500      | 0.287                        | 21.862                           |
| High  | PM6: S-F1 | 1.315                        | 4.778                            | 0.332                         | 29.0651     | 0.301                        | 20.909                           |
|       | PM6: S-F3 | 1.238                        | 5.077                            | 0.420                         | 26.928      | 0.290                        | 21.636                           |
|       | PM6: S-T1 | 1.698                        | 3.701                            | 0.295                         | 36.338      | 0.298                        | 21.092                           |
|       | PM6: S-T2 | 1.688                        | 3.723                            | 0.335                         | 33.760      | 0.302                        | 20.778                           |
|       | PM6: S-M2 | 1.683                        | 3.734                            | 0.290                         | 39.000      | 0.291                        | 21.562                           |
|       | PM6: S-M4 | 1.758                        | 3.575                            | 0.245                         | 46.162      | 0.301                        | 20.847                           |
|       | PM6: S-Y6 | 1.740                        | 3.611                            | 0.270                         | 41.888      | 0.304                        | 20.641                           |
|       | PM6: S-Y9 | 1.665                        | 3.773                            | 0.275                         | 41.126      | 0.288                        | 21.786                           |

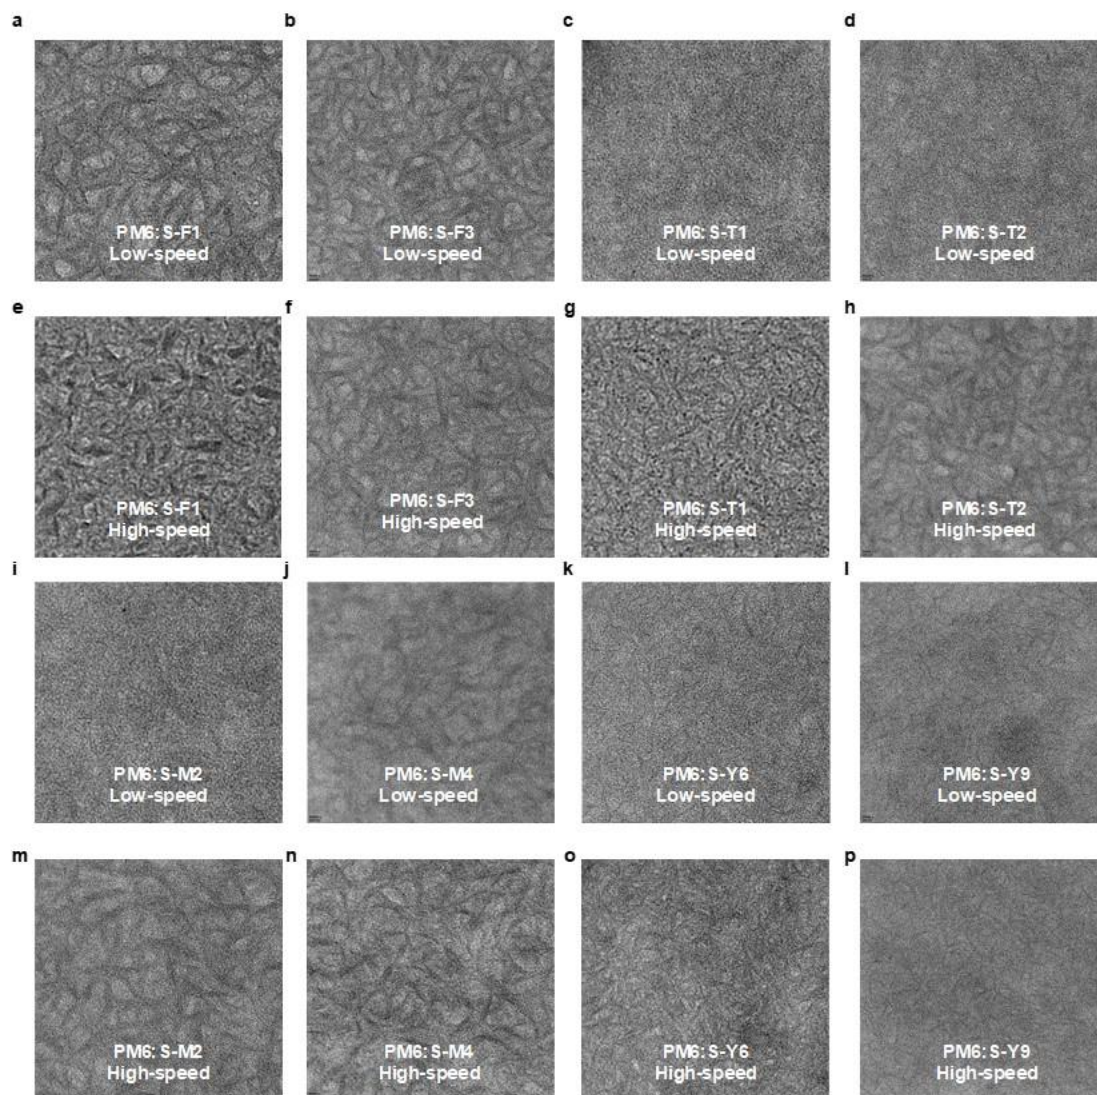

**Supplementary Fig. 17.** The TEM figures of PM6:(a) S-F1, (b) S-F2, (c) S-T1, (d) S-T2, (e) S-M2, (f) S-M4, (g) S-Y6, (h) S-Y9 film fabricated by low speed and the figures of PM6:(i) S-F1, (j) S-F2, (k) S-T1, (l) S-T2, (m) S-M2, (n) S-M4, (o) S-Y6, (p) S-Y9 film fabricated by high speed.

## References

- 1 Brabec, C. J. *et al.* Production Aspects of Organic Photovoltaics and Their Impact on the Commercialization of Devices. *MRS Bull.* **30**, 50-52 (2005).
- 2 Liang, Y. *et al.* For the Bright Future—Bulk Heterojunction Polymer Solar Cells with Power Conversion Efficiency of 7.4%. *Adv. Mater.* **22**, E135-E138 (2010).
- 3 Zhao, G. *et al.* 6.5% Efficiency of Polymer Solar Cells Based on poly(3-hexylthiophene) and Indene-C60 Bisadduct by Device Optimization. *Adv. Mater.* **22**, 4355-4358 (2010).
- 4 Zhao, W. *et al.* Molecular Optimization Enables over 13% Efficiency in Organic Solar Cells. *J. Am. Chem. Soc.* **139**, 7148-7151 (2017).
- 5 Lin, Y. *et al.* An electron acceptor challenging fullerenes for efficient polymer solar cells. *Adv. Mater.* **27**, 1170-1174 (2015).
- 6 Ali, A. *et al.* Evaluating the impact of Hartree–Fock exact exchange on the performance of global hybrid functionals for the vertical excited-state energies of fused-ring electron acceptors using TD-DFT. *Phys. Chem. Chem. Phys.* **24**, 21270-21282 (2022).
- 7 Liu, Y. *et al.* Enhancing the Performance of Non-Fullerene Organic Solar Cells Using Regioregular Wide-Bandgap Polymers. *Macromolecules* **51**, 8646-8651 (2018).
- 8 Ma, Y. *et al.* Efficient Organic Solar Cells from Molecular Orientation Control of M-Series Acceptors. *Joule* **5**, 197-209 (2021).
- 9 Ma, Y. *et al.* 17% efficiency for linear-shaped ADA-type nonfullerene acceptors enabled by 3D reticulated molecular packing. *Nano Energy* **107**, 108116 (2023).
- 10 Tang, C. *et al.* High-Performance Ladder-Type Heteroheptacene-Based Nonfullerene Acceptors Enabled by Asymmetric Cores with Enhanced Noncovalent Intramolecular Interactions. *Angew. Chem. Int. Ed.* **60**, 19314-19323 (2021).

- 11 Yuan, J. *et al.* Single-Junction Organic Solar Cell with over 15% Efficiency Using Fused-Ring Acceptor with Electron-Deficient Core. *Joule* **3**, 1140-1151 (2019).
- 12 Cui, Y. *et al.* Single-Junction Organic Photovoltaic Cells with Approaching 18% Efficiency. *Adv. Mater.* **32**, 1908205 (2020).
- 13 Li, C. *et al.* Non-fullerene acceptors with branched side chains and improved molecular packing to exceed 18% efficiency in organic solar cells. *Nat. Energy* **6**, 605-613 (2021).
- 14 Chen, Y. *et al.* Alkoxy substitution on IDT-Series and Y-Series non-fullerene acceptors yielding highly efficient organic solar cells. *J. Mater. Chem. A* **9**, 7481-7490 (2021).
- 15 Hong, L. *et al.* Eco-Compatible Solvent-Processed Organic Photovoltaic Cells with Over 16% Efficiency. *Adv. Mater.* **31**, 1903441 (2019).
- 16 Zhu, Y. *et al.* Exciton Binding Energy of Non-Fullerene Electron Acceptors. *Adv. Energy Sustain. Res.* **3**, 2100184 (2022).
- 17 Sun, R. *et al.* Single-Junction Organic Solar Cells with 19.17% Efficiency Enabled by Introducing One Asymmetric Guest Acceptor. *Adv. Mater.* **34**, 2110147 (2022).
- 18 Zhan, L. *et al.* Layer-by-Layer Processed Ternary Organic Photovoltaics with Efficiency over 18%. *Adv. Mater.* **33**, 2007231 (2021).
- 19 Yin, B. *et al.* A structurally simple linear conjugated polymer toward practical application of organic solar cells. *Energ. Environ. Sci.* **15**, 4789-4797 (2022).
- 20 Dong, S. *et al.* Single-Component Non-halogen Solvent-Processed High-Performance Organic Solar Cell Module with Efficiency over 14%. *Joule* **4**, 2004-2016 (2020).
- 21 Moustafa, E. *et al.* Thermal Activation of PEDOT:PSS/PM6:Y7 Based Films Leads to Unprecedented High Short-Circuit Current Density in Nonfullerene Organic Photovoltaics. *Adv. Energy Mater.* **13**, 2203241 (2023).
- 22 Liu, W. *et al.* A- $\pi$ -A structured non-fullerene acceptors for stable organic solar cells with efficiency over 17%. *Sci. China Chem.* **65**, 1374-1382 (2022).

- 23 Machui, F. *et al.* Determination of the P3HT:PCBM solubility parameters via a binary solvent gradient method: Impact of solubility on the photovoltaic performance. *Sol. Energy Mater. Sol. Cells* **100**, 138-146 (2012).
